# Supplementary material for: Functional Identification of Catalytic Metal Ion Binding Sites within RNA
Source: PLOS journal article supplement (doi:10.1371/journal.pbio.0030277), 2005-08-10
Supplement: S1 (10.1371/journal.pbio.0030277.s001) [file journal.pbio.0030277.s001]

## “Functional Identification of Catalytic Metal Ion Binding Sites within RNA”

James L. Hougland, Alexander V. Kravchuk, Daniel Herschlag\*, and Joseph A. Piccirilli\*

### Protocol S1. Analysis of $\text{Cd}^{2+}$ rescue profiles

We describe the methods used to fit the  $\text{Cd}^{2+}$  rescue dependencies for reaction of nitrogen and sulfur modified substrates in the presence of WT and C262-S<sub>P</sub> ribozymes. The models and equations presented below follow those from previously reported formulations [1,2].

#### *$\text{Cd}^{2+}$ rescue of $S_{m3'S}$ activity*

The  $\text{Cd}^{2+}$  dependence for rescue of  $S_{m3'S}$  cleavage relative to  $-(1-3)\text{d,rSA}_5$  (Figure 6A) was first fit to a model described by equation s1a, in which the binding of a single  $\text{Cd}^{2+}$  ion rescues reaction of the 3'-thio substrate. Specific  $\text{Cd}^{2+}$  rescue of  $S_{m3'S}$  cleavage in the presence of both WT and C262-S<sub>P</sub> ribozymes was fit to equation s1b, derived from equation s1a, in which  $k_{\text{obs}}^{\text{rel}}$  is the observed relative rate at a given  $\text{Cd}^{2+}$  concentration,  $k_{\text{Mg}}^{\text{rel}}$  is the relative rate in  $\text{Mg}^{2+}$  alone, “a” is the observed stimulation of relative cleavage rate upon  $\text{Cd}^{2+}$  binding at the  $M_A$  site ( $a = k_{\text{Cd}}^{\text{rel}} / k_{\text{Mg}}^{\text{rel}}$ ), and  $K_{\text{d,app}}^{\text{Cd,E}\cdot\text{S}\cdot\text{G}}$  is the apparent affinity for binding of the rescuing  $\text{Cd}^{2+}$  ion to the E•S•G ternary complex at a given background  $\text{Mg}^{2+}$  concentration. Rescue of  $S_{m3'S}$  observed in the WT ribozyme reaction fit well to this model. The rescue observed in the C262-S<sub>P</sub> variant

ribozyme reaction deviated slightly but significantly from this model (data not shown).  $\text{Cd}^{2+}$  rescue of  $\text{S}_{\text{m3'S}}$  cleavage activity with both WT and C262- $\text{S}_{\text{P}}$  was then fit using equation s1c, a modified form of equation s1b that allows for cooperative  $\text{Cd}^{2+}$  binding, with cooperativity constant  $n$ . Rescue with the WT ribozyme fit to this equation with  $n = 1$ , consistent with no apparent cooperativity effects on  $\text{Cd}^{2+}$  binding at metal ion site A. Rescue with the C262- $\text{S}_{\text{P}}$  ribozyme fit with  $n = 1.2$ , consistent with a small cooperative effect on  $\text{Cd}^{2+}$  binding or function at metal ion site A for the C262- $\text{S}_{\text{P}}$  ribozyme. This small change in cooperativity may result from altered  $\text{Cd}^{2+}$  binding at the  $\text{M}_{\text{C}}$  site that slightly perturbs the  $\text{Cd}^{2+}$  ion at  $\text{M}_{\text{A}}$ . Nevertheless, the rescue data are still consistent with the rescue of 3'-thio substrate cleavage by a single  $\text{Cd}^{2+}$  ion binding at metal ion site A. Comparison of  $\text{Cd}^{2+}$  rescue observed with both WT and C262- $\text{S}_{\text{P}}$  ribozymes suggests that the  $\text{S}_{\text{P}}$ -phosphorothioate substitution at C262 does not significantly alter  $\text{Cd}^{2+}$  binding and rescue at metal ion site A.

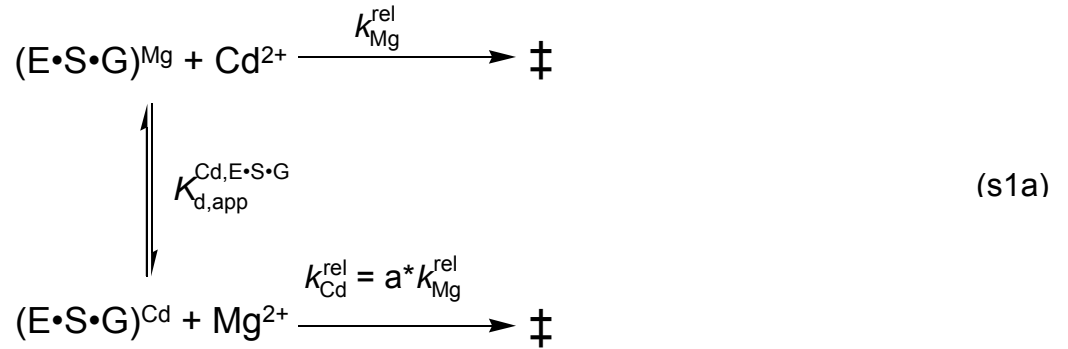

$$k_{\text{obs}}^{\text{rel}} = k_{\text{Mg}}^{\text{rel}} \left( \frac{K_{\text{d,app}}^{\text{Cd,E} \cdot \text{S} \cdot \text{G}} + a \cdot [\text{Cd}^{2+}]}{K_{\text{d,app}}^{\text{Cd,E} \cdot \text{S} \cdot \text{G}} + [\text{Cd}^{2+}]} \right) \tag{s1b}$$

$$k_{\text{obs}}^{\text{rel}} = k_{\text{Mg}}^{\text{rel}} \left( \frac{(K_{\text{d,app}}^{\text{Cd,E}\cdot\text{S}\cdot\text{G}})^n + a^*[\text{Cd}^{2+}]^n}{(K_{\text{d,app}}^{\text{Cd,E}\cdot\text{S}\cdot\text{G}})^n + [\text{Cd}^{2+}]^n} \right) \quad (\text{s1c})$$

*CUCG<sub>3</sub>SA activity rescue by a single Cd<sup>2+</sup> ion*

The Cd<sup>2+</sup> dependence for reaction of CUCG<sub>3</sub>SA relative to CUCGA (Figure 6B) is consistent with the model outlined in equation s2a, with one Cd<sup>2+</sup> ion binding to the E•P complex and specifically stimulating CUCG<sub>3</sub>SA cleavage. The data were fit to equation s2b, derived from equation s2a, in which  $k_{\text{obs}}^{\text{rel}}$  is the observed relative rate at a given Cd<sup>2+</sup> concentration,  $k_{\text{Mg}}^{\text{rel}}$  is the relative rate in Mg<sup>2+</sup> alone, “a” is the observed stimulation of relative cleavage rate upon Cd<sup>2+</sup> binding at the M<sub>B</sub> site ( $a = k_{\text{Cd}}^{\text{rel}} / k_{\text{Mg}}^{\text{rel}}$ ), and  $K_{\text{d,app}}^{\text{Cd,E}\cdot\text{P}}$  is the apparent Cd<sup>2+</sup> binding affinity to the E•P complex at the M<sub>B</sub> site at a given background Mg<sup>2+</sup> concentration. Cd<sup>2+</sup> rescue at site M<sub>B</sub> with both WT and C262-S<sub>P</sub> ribozymes fits well to this model (Figure 6B) and is unchanged, suggesting that cleavage of CUCG<sub>3</sub>SA is specifically rescued by a single Cd<sup>2+</sup> ion binding at metal ion site B in both ribozymes.

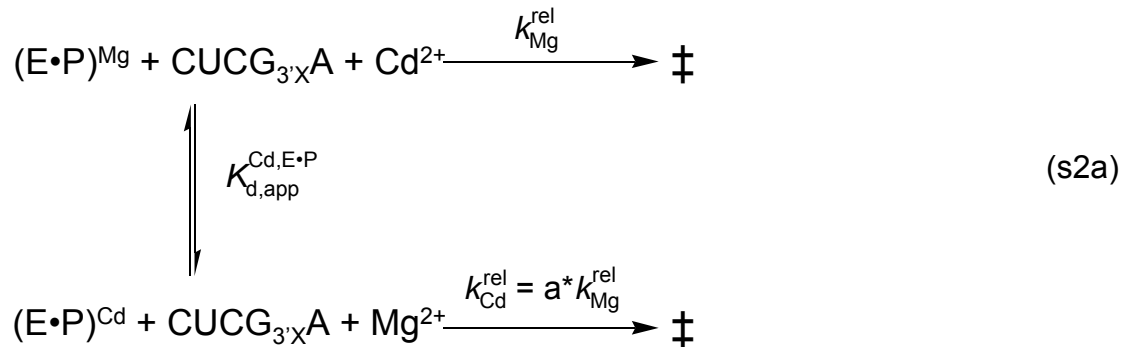

$$k_{\text{obs}}^{\text{rel}} = k_{\text{Mg}}^{\text{rel}} \left( \frac{K_{\text{d,app}}^{\text{Cd,E}\cdot\text{P}}}{K_{\text{d,app}}^{\text{Cd,E}\cdot\text{P}} + [\text{Cd}^{2+}]} \right) + a \cdot k_{\text{Mg}}^{\text{rel}} \left( \frac{[\text{Cd}^{2+}]}{K_{\text{d,app}}^{\text{Cd,E}\cdot\text{P}} + [\text{Cd}^{2+}]} \right) \quad (\text{s2b})$$

*Rescue of  $G_N$  activity by a single  $\text{Cd}^{2+}$  ion under  $(k_c/K_m)^G$  (or  $G_N$ ) conditions*

The  $\text{Cd}^{2+}$  dependence for oligonucleotide substrate (S) cleavage by  $G_N$  relative to cleavage by G, measured under subsaturating G or  $G_N$  conditions [ $(k_c/K_m)^G$  (or  $G_N$ ) conditions] (Figure 6C), is consistent with the model outlined in equation s3a, in which the binding of one  $\text{Cd}^{2+}$  ion to the E•S complex specifically stimulates cleavage by  $G_N$ . The data were fit to equation s3b, derived from equation s3a, in which  $k_{\text{obs}}^{\text{rel}}$  is the observed relative rate at a given  $\text{Cd}^{2+}$  concentration,  $k_{\text{Mg}}^{\text{rel}}$  is the relative rate in  $\text{Mg}^{2+}$  alone, “a” is the observed stimulation of relative cleavage rate upon  $\text{Cd}^{2+}$  binding at the  $M_C$  site ( $a = k_{\text{Cd}}^{\text{rel}} / k_{\text{Mg}}^{\text{rel}}$ ), and  $K_{\text{d,app}}^{\text{Cd,E}\cdot\text{S}}$  is the apparent  $\text{Cd}^{2+}$  binding affinity to the E•S complex at the  $M_C$  site at a given background  $\text{Mg}^{2+}$  concentration. The  $\text{Cd}^{2+}$  dependence of  $k_{\text{obs}}^{\text{rel}}$  fit well to this model for reactions catalyzed by both the WT and C262-S<sub>P</sub> ribozymes, consistent with specific stimulation of S cleavage by  $G_N$  from a single  $\text{Cd}^{2+}$  ion binding at metal ion site C in both ribozymes (Figure 6C).

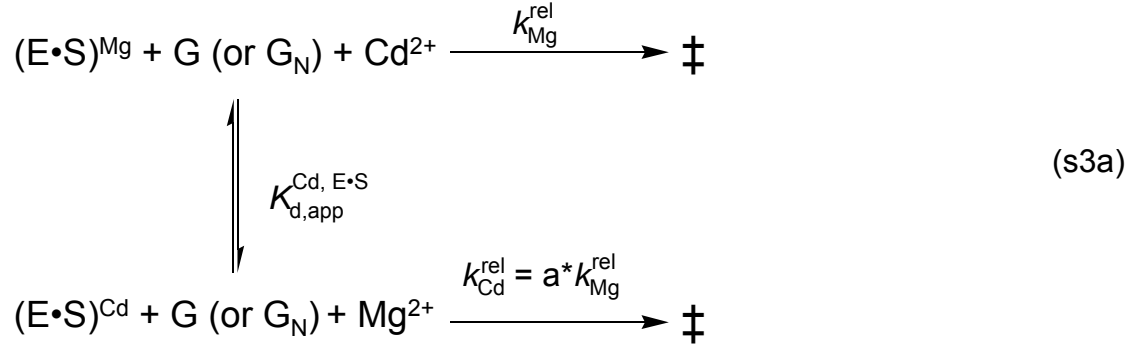

$$k_{\text{obs}}^{\text{rel}} = k_{\text{Mg}}^{\text{rel}} \left( \frac{K_{\text{d,app}}^{\text{Cd, E}\cdot\text{S}}}{K_{\text{d,app}}^{\text{Cd, E}\cdot\text{S}} + [\text{Cd}^{2+}]} \right) + a^* k_{\text{Mg}}^{\text{rel}} \left( \frac{[\text{Cd}^{2+}]}{K_{\text{d,app}}^{\text{Cd, E}\cdot\text{S}} + [\text{Cd}^{2+}]} \right)
 \tag{s3b}$$

*Rescue of G<sub>N</sub> activity by a single Cd<sup>2+</sup> ion under (E•S•G/G<sub>N</sub>)<sub>O</sub> → products (k<sub>ternary</sub>) conditions*

The Cd<sup>2+</sup> dependence for S cleavage by G<sub>N</sub> relative to cleavage by G under (E•S•G/G<sub>N</sub>)<sub>O</sub> → products (k<sub>ternary</sub>) conditions (Figure 6D) is consistent with the model outlined in equation s4a, in which the binding of one Cd<sup>2+</sup> ion to the E•S•G/G<sub>N</sub> ternary complex specifically stimulates cleavage by G<sub>N</sub>. The data were fit to equation s4b, derived from equation s4a, in which  $k_{\text{obs}}^{\text{rel}}$  is the observed relative rate at a given Cd<sup>2+</sup> concentration,  $k_{\text{Mg}}^{\text{rel}}$  is the relative rate in Mg<sup>2+</sup> alone, “a” is the observed stimulation of relative cleavage rate upon Cd<sup>2+</sup> binding at the M<sub>C</sub> site ( $a = k_{\text{Cd}}^{\text{rel}} / k_{\text{Mg}}^{\text{rel}}$ ), and  $K_{\text{d,app}}^{\text{Cd, E}\cdot\text{S}\cdot\text{G/G}_\text{N}}$  is the apparent Cd<sup>2+</sup> binding affinity to the E•S•G/G<sub>N</sub> ternary complex at the M<sub>C</sub> site at a given background Mg<sup>2+</sup>

concentration. The  $\text{Cd}^{2+}$  dependence of  $k_{\text{obs}}^{\text{rel}}$  fit well to this model for reactions catalyzed by both WT and C262-S<sub>P</sub> ribozymes, consistent with specific stimulation of G<sub>N</sub> cleavage of S from a single  $\text{Cd}^{2+}$  ion binding at the M<sub>C</sub> site in both ribozymes.

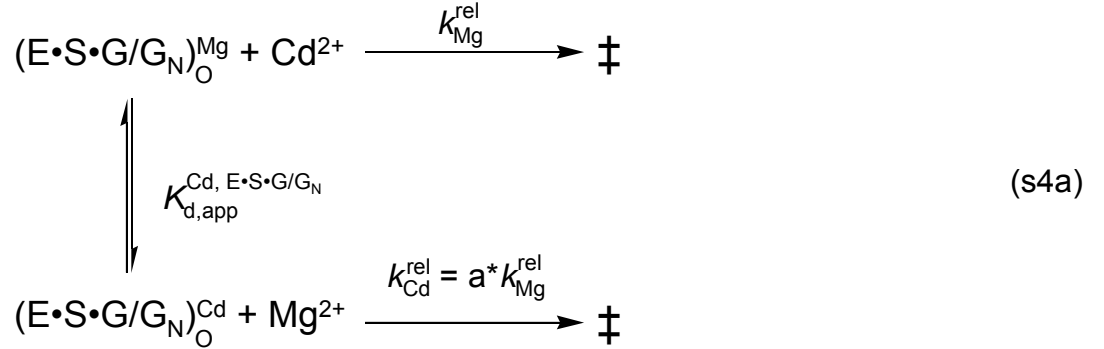

$$k_{\text{obs}}^{\text{rel}} = k_{\text{Mg}}^{\text{rel}} \left( \frac{K_{\text{d,app}}^{\text{Cd, E} \cdot \text{S} \cdot \text{G}/\text{G}_\text{N}}}{K_{\text{d,app}}^{\text{Cd, E} \cdot \text{S} \cdot \text{G}/\text{G}_\text{N}} + [\text{Cd}^{2+}]} \right) + a^* k_{\text{Mg}}^{\text{rel}} \left( \frac{[\text{Cd}^{2+}]}{K_{\text{d,app}}^{\text{Cd, E} \cdot \text{S} \cdot \text{G}/\text{G}_\text{N}} + [\text{Cd}^{2+}]} \right) \tag{s4b}$$

*Rescue of S<sub>Sp</sub> substrate activity by two Cd<sup>2+</sup> ions under (E•S•G/G<sub>N</sub>)<sub>O</sub> → products*

*(k<sub>ternary</sub>) conditions*

We determined the  $\text{Cd}^{2+}$  dependence for C262-S<sub>P</sub> ribozyme catalyzed cleavage of the S<sub>Sp</sub> substrate with both G and G<sub>N</sub> relative to the reaction of the -(1-3)d,rSA<sub>5</sub> substrate with G (Figures 7B and 7D, respectively). Reactions were monitored under (E•S•G/G<sub>N</sub>)<sub>O</sub> → products ( $k_{\text{ternary}}$ ) conditions. The data are consistent with the model depicted in equation s5a, in which two  $\text{Cd}^{2+}$  ions bind to the ribozyme at the metal ion sites A and C to specifically stimulate S<sub>Sp</sub> substrate cleavage. In

this model,  $(E \cdot S \cdot G/G_N)_{Mg_C}^{Mg_A}$  is ribozyme with  $Mg^{2+}$  bound at both metal ion sites A and C,  $(E \cdot S \cdot G/G_N)_{Mg_C}^{Cd_A}$  is ribozyme with  $Cd^{2+}$  bound at metal ion site A and  $Mg^{2+}$  bound at metal ion site C,  $(E \cdot S \cdot G/G_N)_{Cd_C}^{Mg_A}$  is ribozyme with  $Mg^{2+}$  bound at metal site A and  $Cd^{2+}$  bound at metal ion site C, and  $(E \cdot S \cdot G/G_N)_{Cd_C}^{Cd_A}$  is ribozyme with  $Cd^{2+}$  bound at both metal ion sites. This model assumes that no stimulation of  $S_{Sp}$  cleavage activity occurs unless  $Cd^{2+}$  ions occupy both the metal ion binding sites, and that  $Cd^{2+}$  affinities at these two sites are independent of one another. More complex models are possible as described by Wang et al., but equation s5a provides the simplest model that accounts quantitatively for the data [3]. The data were fit to equation s5b, derived from equation s5a, in which  $k_{obs}^{rel}$  is the observed relative rate at a given  $Cd^{2+}$  concentration,  $k_{Mg}^{rel}$  is the relative rate in  $Mg^{2+}$  alone,  $a$  is the observed stimulation of relative cleavage rate upon  $Cd^{2+}$  binding at both metal ion binding sites, and  $K_{d,app}^{Cd,M_A}$  and  $K_{d,app}^{Cd,M_C}$  are the apparent  $Cd^{2+}$  binding affinities to the  $E \cdot S \cdot G/G_N$  complex at metal ion sites A and C, respectively, in a given  $Mg^{2+}$  background concentration.

For cleavage of  $S_{Sp}$  in the presence of saturating  $G_N$ ,  $K_{d,app}^{Cd,M_C}$  was fixed at 0.2 mM, the apparent  $Cd^{2+}$  affinity observed at metal ion site C during  $Cd^{2+}$  rescue of substrate cleavage by  $G_N$  under  $k_{ternary}$  conditions (Figure 6D). The  $Cd^{2+}$  rescue profile for cleavage of  $S_{Sp}$  by the C262-Sp ribozyme in the presence of bound  $G_N$  partially supports the assumption that no stimulation of  $S_{Sp}$  cleavage occurs unless  $Cd^{2+}$  occupies both the  $M_A$  and  $M_C$  binding sites. In the presence of bound  $G_N$ , the  $S_{Sp}$  reaction exhibits significant stimulation only at  $Cd^{2+}$

concentrations near  $K_{d,app}^{Cd,Mg} = 0.2$  mM (cf. Figure 6D), suggesting that the

$(E \cdot S \cdot G/G_N)_{Cd_C}^{Mg_A}$  complex reacts no faster than the  $(E \cdot S \cdot G/G_N)_{Mg_C}^{Mg_A}$  complex. As discussed in the following section, alternative models for stimulation of the  $S_{Sp}$  reaction by a single  $Cd^{2+}$  ion also appear unlikely.

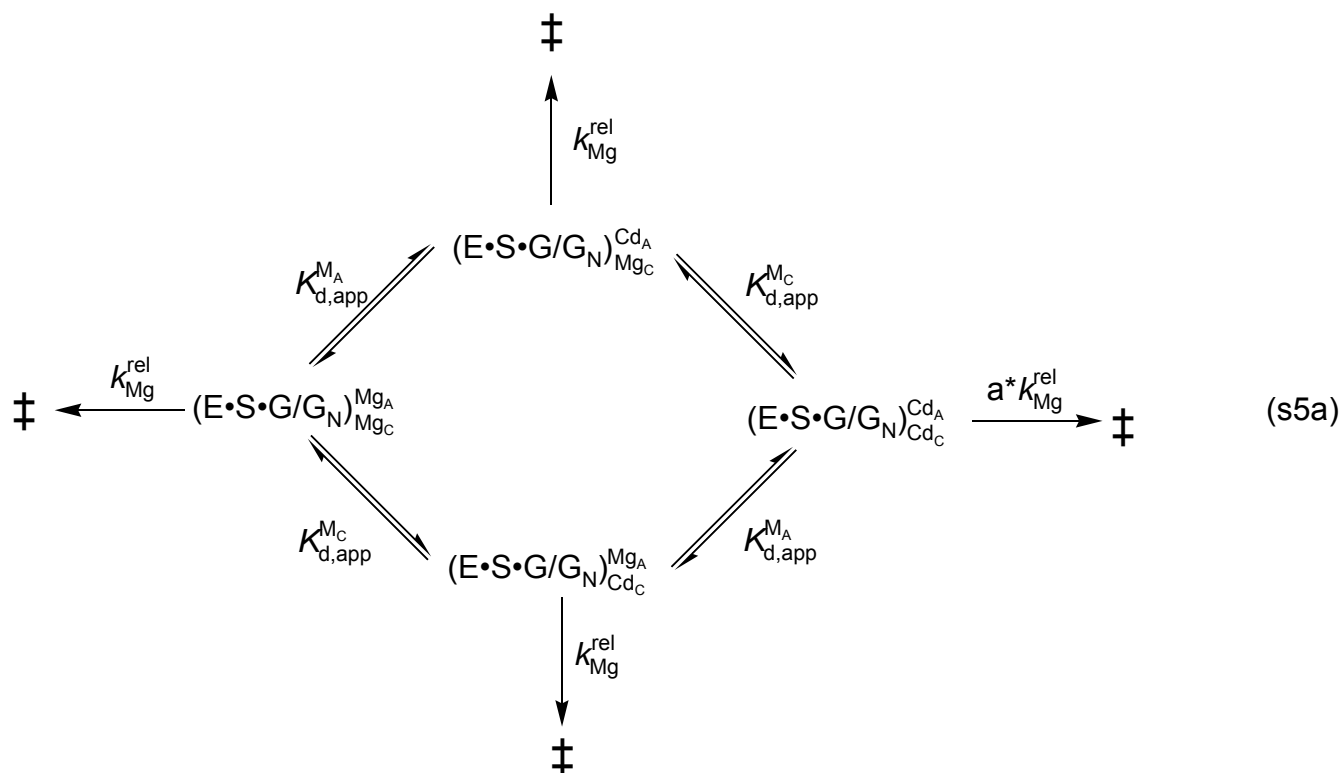

$$K_{\text{obs}}^{\text{rel}} = K_{\text{Mg}}^{\text{rel}} \left( \frac{1 + \frac{[\text{Cd}^{2+}]}{K_{\text{d,app}}^{\text{M}_\text{A}}} + \frac{[\text{Cd}^{2+}]}{K_{\text{d,app}}^{\text{M}_\text{C}}} + a^* \frac{[\text{Cd}^{2+}]^2}{K_{\text{d,app}}^{\text{M}_\text{A}} K_{\text{d,app}}^{\text{M}_\text{C}}}}{1 + \frac{[\text{Cd}^{2+}]}{K_{\text{d,app}}^{\text{M}_\text{A}}} + \frac{[\text{Cd}^{2+}]}{K_{\text{d,app}}^{\text{M}_\text{C}}} + \frac{[\text{Cd}^{2+}]^2}{K_{\text{d,app}}^{\text{M}_\text{A}} K_{\text{d,app}}^{\text{M}_\text{C}}}} \right) \quad (\text{s5b})$$

***Alternative models for the change in  $\text{Cd}^{2+}$  dependence of  $S_{\text{Sp}}$  substrate rescue in the presence of saturating  $G_{\text{N}}$  and the C262- $S_{\text{P}}$  ribozyme***

Two other models to explain the change in  $\text{Cd}^{2+}$  dependence of  $S_{\text{Sp}}$  cleavage upon C262- $S_{\text{P}}$  mutation require consideration. First, the C262- $S_{\text{P}}$  phosphorothioate could perturb the ribozyme active site sufficiently as to allow only one metal ion,  $\text{M}_\text{A}$  or  $\text{M}_\text{C}$ , to coordinate to the substrate  $S_{\text{P}}$ -phosphorothioate mutation in the transition state, resulting in a  $\text{Cd}^{2+}$  rescue profile that reflects only one rescuing metal ion. However, this model is inconsistent with the rescue by two  $\text{Cd}^{2+}$  ions exhibited by the  $S_{\text{Sp}}$  reaction in the presence of saturating guanosine, assuming the G and  $G_{\text{N}}$ -bound ribozyme active sites are identical except for the  $2'\text{-OH} \rightarrow 2'\text{-NH}_2$  modification (a change with minimal steric consequences and minimal functional effects in the WT reaction [4,5]).

Second, the  $\text{Cd}^{2+}$  rescue observed for  $S_{\text{Sp}}$  cleavage in the presence of saturating  $G_{\text{N}}$  could reflect only  $\text{M}_\text{C}$  rescue of the  $G_{\text{N}}$ -induced reactivity defect, without any rescue of the  $S_{\text{P}}$  phosphorothioate mutation itself. If this model were valid, the  $\text{Cd}^{2+}$  rescue profile observed for  $S_{\text{Sp}}$  cleavage by saturating  $G_{\text{N}}$  should be identical to the profile obtained during  $\text{Cd}^{2+}$  rescue of  $G_{\text{N}}$  cleavage of the -1r,dSA<sub>5</sub> substrate under  $k_{\text{ternary}}$  conditions, i.e. saturating  $G_{\text{N}}$  (Figure 6D), with

rescue reaching a plateau above 1 mM  $\text{Cd}^{2+}$  as metal ion site C saturates with an apparent  $\text{Cd}^{2+}$  binding affinity of  $\sim 0.2$  mM. However,  $\text{Cd}^{2+}$  rescue of  $S_{\text{Sp}}$  cleavage activity in the presence of saturating  $G_N$  increases linearly up to 1 mM  $\text{Cd}^{2+}$ , inconsistent with this stimulation reflecting  $\text{Cd}^{2+}$  binding at only metal ion site C. This continued increase in  $S_{\text{Sp}}$  activity is consistent with rescue requiring  $\text{Cd}^{2+}$  ion binding at both a high affinity site that saturates at low  $\text{Cd}^{2+}$  concentration (metal ion site C) and a low-affinity  $\text{Cd}^{2+}$  ion binding site (metal ion site A) that does not saturate within the experimentally accessible  $\text{Cd}^{2+}$  concentration range.

- 1 Shan S, Yoshida A, Sun SG, Piccirilli JA, Herschlag D (1999) Three metal ions at the active site of the *Tetrahymena* group I ribozyme. *Proc Natl Acad Sci USA* 96: 12299-12304.
- 2 Shan S, Kravchuk AV, Piccirilli JA, Herschlag D (2001) Defining the catalytic metal ion interactions in the *Tetrahymena* ribozyme reaction. *Biochemistry* 40: 5161-5171.
- 3 Wang SL, Karbstein K, Peracchi A, Beigelman L, Herschlag D (1999) Identification of the hammerhead ribozyme metal ion binding site responsible for rescue of the deleterious effect of a cleavage site phosphorothioate. *Biochemistry* 38: 14363-14378.
- 4 Shan SO, Herschlag D (1999) Probing the role of metal ions in RNA catalysis: Kinetic and thermodynamic characterization of a metal ion interaction with the 2'-moiety of the guanosine nucleophile in the *Tetrahymena* group I ribozyme. *Biochemistry* 38: 10958-10975.
- 5 Sjogren AS, Pettersson E, Sjoberg BM, Stromberg R (1997) Metal ion interaction with cosubstrate in self-splicing of group I introns. *Nucleic Acids Res* 25: 648-653.
